# Supplementary figures and images for: Compound-Specific 14N/15N Analysis of Amino Acid Trimethylsilylated Derivatives from Plant Seed Proteins
Source: MDPI journal article supplement (doi:10.3390/ijms23094893), 2022-04-28

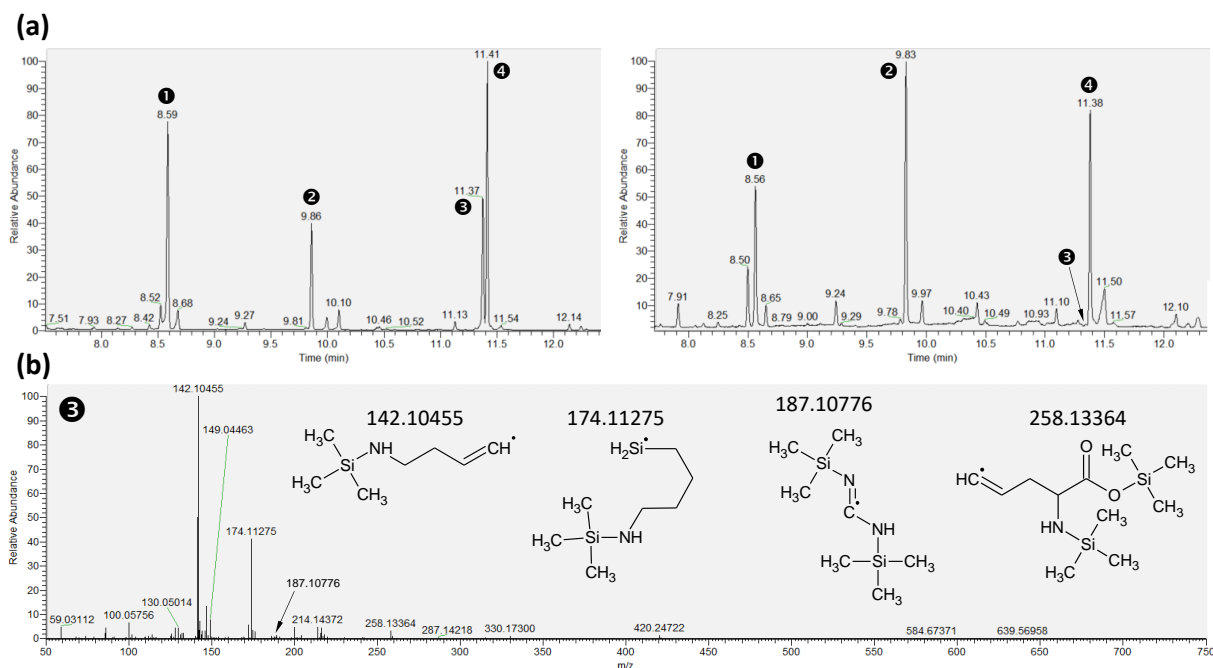

Supplement: s1 [file s1]
